# Supplementary material for: An HDAC-dependent epigenetic mechanism that enhances the efficacy of the antidepressant drug fluoxetine
Source: PubMed Central journal article supplement (PMC4313090; doi:10.1038/srep08171), 2015-02-02
Supplement: srep08171-s1.pdf [file srep08171-s1.pdf]

# **An HDAC-dependent epigenetic mechanism that enhances the efficacy of the antidepressant drug fluoxetine**

**C. Schmauss<sup>1,2\*</sup>**

**<sup>1</sup>Department of Psychiatry, Columbia University and <sup>2</sup> Division of Molecular Therapeutics, New York State Psychiatric Institute, New York, NY 10032**

## **SUPPLEMENTARY MATERIAL**

**Supplementary Fig. 1 *The effects of adolescent Ana-12 treatment on the emotional behavior of SFR mice.***

**Supplementary Fig. 2. *The effects of HDAC inhibitors alone on the emotional behavior of SFR mice.***

**Supplementary Fig. 3. *The effects of HDAC inhibitors alone on acH4K12 and Pol II enrichment at Bdnf promoters 1 to 3.***

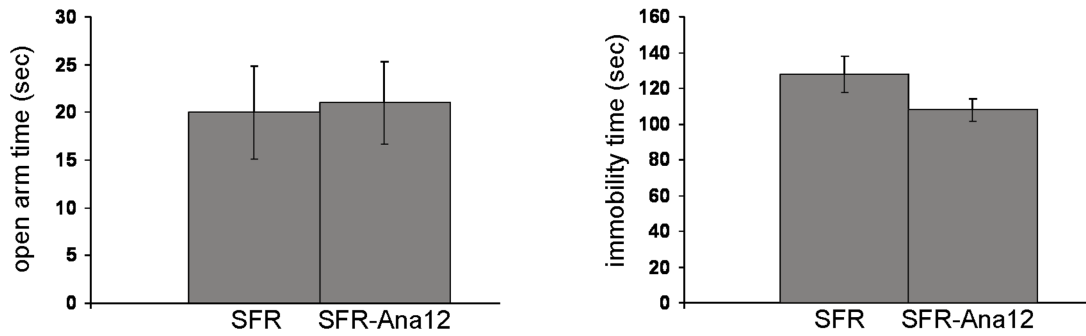

**Supplementary Fig. 1. *The effects of adolescent Ana-12 treatment on the emotional behavior of SFR mice.*** SFR mice treated during adolescence with Ana-12 exhibited unaltered behavior in the EPM (left) and a moderate decrease in immobility in the FST (right) that did not reach significance compared with non-treated SFR mice ( $p=0.06$ ; Student's  $t$  test). Data are mean  $\pm$  sem of 9 animals/group (5 males and 4 females).

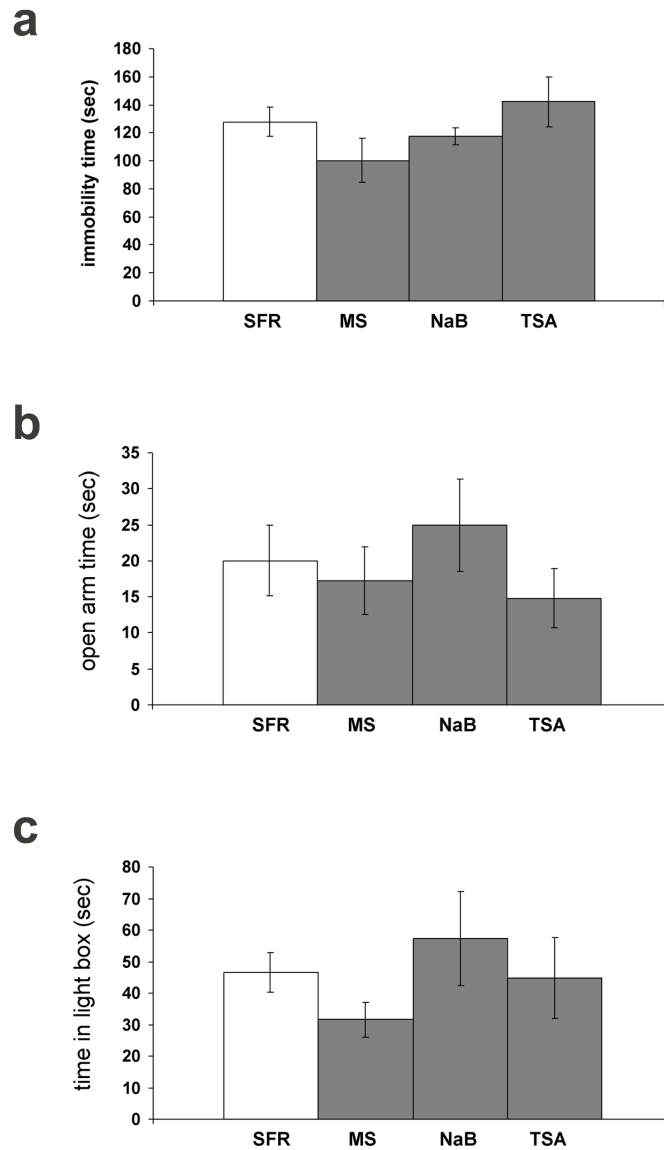

**Supplementary Fig. 2. The effects of HDAC inhibitors alone on the emotional behavior of SFR mice.** SFR mice treated during adolescence only with HDAC inhibitors exhibited unaltered behavior in (a) the FST (ANOVA,  $F_{(3,26)}=1.704$ ,  $p=0.19$ ), (b) the EPM (ANOVA  $F_{(3,30)}=0.5224$ ,  $p=0.67$ ) and (c), the Light/Dark exploration (ANOVA,  $F_{(3,25)}=1.41$ ,  $p=0.266$ ). Data are mean  $\pm$  sem of 6 to 8 animals/group (equal number of males and females).

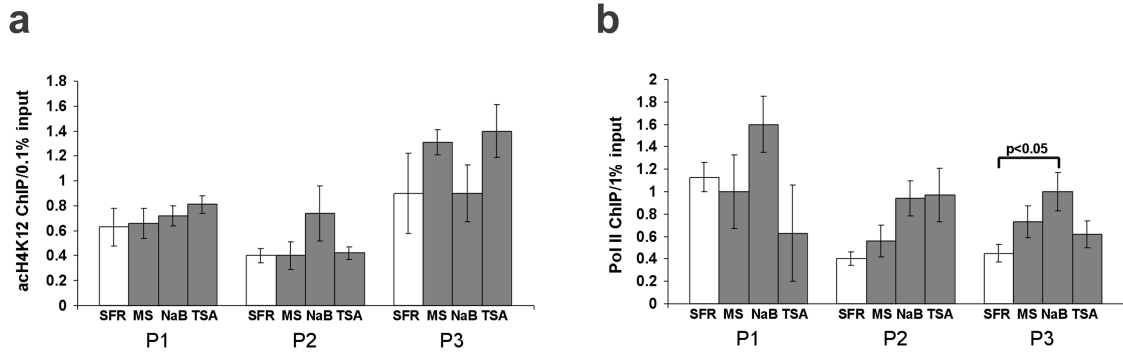

**Supplementary Fig. 3. The effects of HDAC inhibitors alone on acH4K12 and Pol II enrichment at *Bdnf* promoters 1 to 3.** (a) In SFR mice treated during adolescence only with HDAC inhibitors, neither HDAC inhibitor alone significantly increased acH4K12 levels at *Bdnf* promoters 1 to 3 (ANOVA, P1:  $F_{(3,22)}=0.6018$ ,  $p=0.6$ ; P2:  $F_{(3,20)}=3.65$ ,  $p=0.04$ ; P3:  $F_{(3,20)}=0.42$ ,  $p=0.74$ ). (b) Pol II densities at *Bdnf* promoter 1 did not significantly differ (ANOVA, P1:  $F_{(3,20)}=0.7132$ ,  $p=0.6$ ) and, although HDAC inhibitor-treated SFR mice exhibited higher levels of Pol II at *Bdnf* promoter 2, these differences did not reach significance (ANOVA, P2:  $F_{(3,20)}=3.06$ ,  $p=0.06$ ). HDAC inhibitor-treated SFR mice also exhibited higher levels of Pol II at *Bdnf* promoter 3 (ANOVA, P3:  $F_{(3,20)}=4.84$ ,  $p=0.014$ ), but significantly higher levels of Pol II were only detected in NaB-treated mice.
